# Supplementary material for: The Middle Pleistocene Hippopotamus from Malagrotta (Latium, Italy): New Data and Future Perspectives
Source: MDPI journal article supplement (doi:10.3390/quat7010013), 2024-02-29
Supplement: s1 [file s1]

## **List of material stored in the MCZR from Malagrotta**

MCZR n.c. right P2/P3; MCZR n.c. fragmented molar; MCZR PV 2010.2690 fragmented right hemimandible with m3, isolated first lower incisor, isolated fragmented right lower canine, isolated fragmented upper canine. MCZR 2010.2690B fragmented left hemimandible with m2 almost complete and m3; MCZR n.c. fragmented left lower canine; MCZR n.c left p1; MCZR PV 2010.2677 fragmented thoracic vertebra; MCZR PV 2010.2678 fragmented vertebra; MCZR PV 2010.2679 fragmented vertebra; MCZR PV 2010.2680 fragmented vertebra; MCZR PV 2010.2681 fragmented vertebra; MCZR PV 2010.2682 fragmented vertebra; MCZR PV 2010.2683 fragmented vertebra; MCZR PV 2010.2684 fragmented vertebra; MCZR PV 2010.2697 fragmented costa; MCZR PV 2010.2698 fragmented costa; MCZR PV 2010.2699 fragmented costa; MCZR PV 2010.2700 fragmented costa; MCZR PV 2010.2701 fragmented costa; MCZR PV 2010.2702 fragmented costa; MCZR PV 2010.2703 fragmented costa; MCZR PV 2010.2704 fragmented costa; MCZR PV 2010.2705 fragmented costa; MCZR PV 2010.2706 fragmented costa; MCZR PV 2010.2707 fragmented costa; MCZR PV 2010.2708 fragmented costa; MCZR PV 2010.2709 fragmented costa; MCZR PV 2010.2710 fragmented costa; MCZR PV 2010.2711 fragmented costa; MCZR PV 2010.2712 fragmented costa; MCZR PV 2010.2713 fragmented costa; MCZR PV 2010.2714 fragmented costa; MCZR PV 2010.2715 fragmented costa; MCZR PV 2010.2716 fragmented costa; MCZR PV 2010.2717 fragmented costa; MCZR PV 2010.2718 fragmented costa; MCZR PV 2010.2691 right fragmented humerus; MCZR n.c. distal fragmented metapodial; MCZR PV 2010.0074 fragmented right humerus; MCZR n.c. left scaphoid; MCZR 2010.2692 fragmented juvenile proximal tibia; MCZR PV 2010.0075 right unciform; MCZR PV 2010.0076 right calcaneum.
